# Supplementary material for: Temporal Trends, Clinical Characteristics, and Outcomes of Emergent Coronary Artery Bypass Grafting for Acute Myocardial Infarction in the United States
Source: PubMed Central journal article supplement — J Am Heart Assoc. 2021 Jul 21;10(15):e020517. doi: 10.1161/JAHA.120.020517 (PMC8475667; doi:10.1161/jaha.120.020517), 2021-07-21
Supplement: JAH3-10-e020517-s001.pdf [file JAH3-10-e020517-s001.pdf]

# **SUPPLEMENTAL MATERIAL**

**Table S1. Administrative codes used for identification of diagnoses and procedures.**

| <b>Comorbidity</b>                 | <b>International Classification of Diseases 9.0 Clinical Modification Codes</b> |
|------------------------------------|---------------------------------------------------------------------------------|
| Coronary artery bypass grafting    | 36.10, 36.11, 36.12, 36.13, 36.14, 36.15, 36.16, 36.19                          |
| Cardiogenic shock                  | 785.51                                                                          |
| Cardiac arrest                     | 427.5, 427.4, 427.41, 427.42, 99.60, 99.63                                      |
| Coronary angiography               | 37.22, 37.23, 88.53-88.56                                                       |
| Percutaneous coronary intervention | 00.66, 36.01, 36.02, 36.05, 36.06, 36.07, 88.57                                 |
| Invasive hemodynamic assessment    | 89.63, 89.64, 89.66, 89.67, 89.68                                               |
| Mechanical circulatory support     | 37.61, 37.68, 39.65                                                             |
| Invasive mechanical ventilation    | 96.7, 96.70, 96.71, 96.72                                                       |
| Hemodialysis                       | 39.95                                                                           |
| Multi-organ failure                | 570.0, 572.2, 573.3, 573.4                                                      |
|                                    | 518.81, 518.82, 518.85, 786.09, 799.1, 96.7, 96.70, 96.71, 96.72                |
|                                    | 584, 584.5, 584.6, 584.7, 584.8, 584.9                                          |
|                                    | 286.6-286.9, 287.4, 287.5                                                       |
|                                    | 293, 293.0, 293.1, 293.8, 293.81-293.84, 293.89, 293.9, 348.1, 348.3, 348.30,   |
|                                    | 348.81, 348.39, 780.01, 780.09, 89.14                                           |
| Tracheostomy                       | 311, 312, 3121, 3129                                                            |

**Figure S1. Temporal trends of admissions receiving CABG across various sub-groups of age stratified by AMI type.**

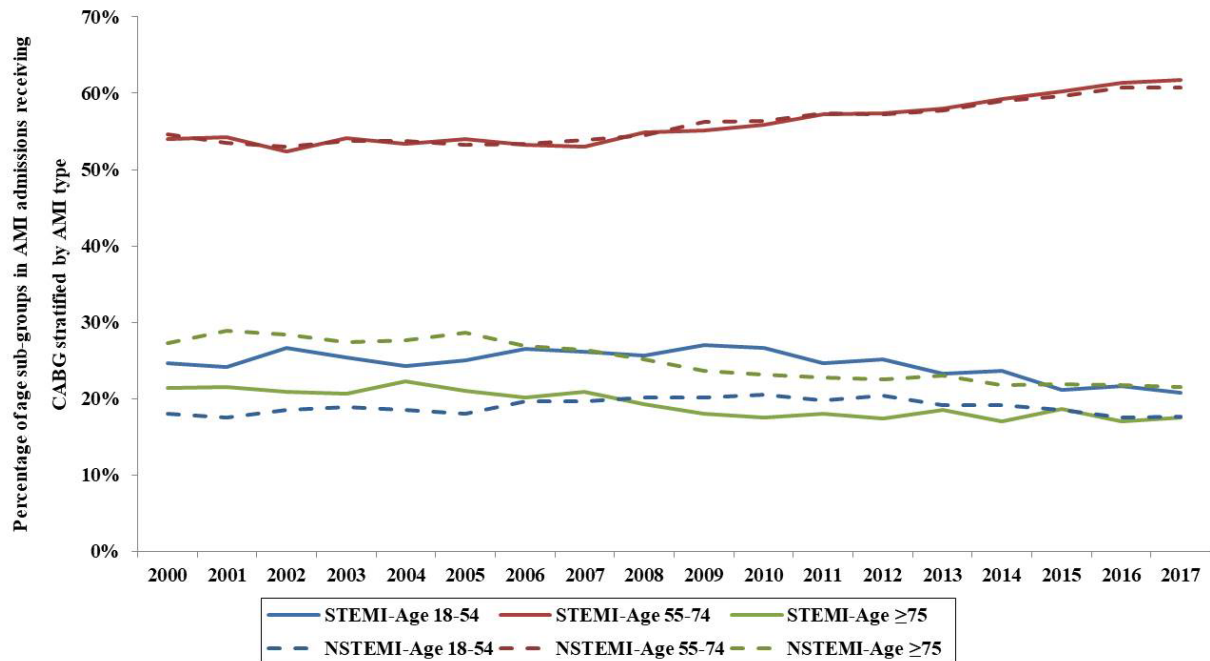

Temporal trends of percentage of age sub-groups in AMI admissions receiving CABG stratified by type of AMI; all  $p < 0.001$  for trend

AMI: acute myocardial infarction; CABG: coronary artery bypass grafting; NSTEMI: non-ST-segment elevation myocardial infarction; STEMI: ST-segment elevation myocardial infarction
